# Supplementary material for: Involvement of Lipid Rafts in the Invasion of Opportunistic Bacteria Serratia into Eukaryotic Cells
Source: MDPI journal article supplement (doi:10.3390/ijms24109029), 2023-05-20
Supplement: s1 [file s1]

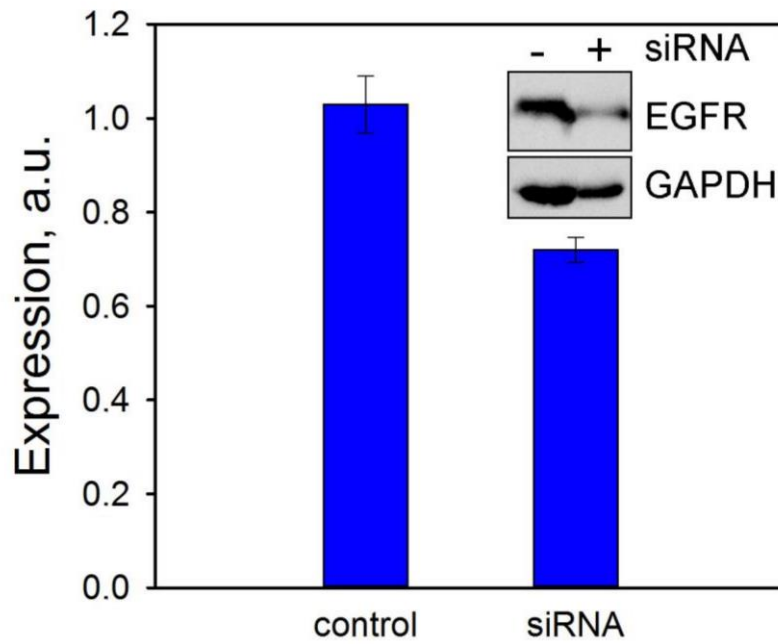

**Figure S1. Effect of treating M-HeLa cells with siRNA on EGFR expression in the host cell.** Expression levels of EGFR in treating M-HeLa cells with siRNA targeting EGFR were determined using real-time RT-PCR. Control - M-HeLa cells transfected with siRNA containing scrambled nucleotide sequence. The insert shows the total amount of EGFR and internal control GAPDH in untreated M-HeLa cells and pretreating cells with small interfering RNA at the according to the manufacturer's protocol. Values are expressed as mean  $\pm$  S.D. (error bars). A difference was considered significant at the  $p < 0,05$  level.
